# Supplementary material for: Stretchable, compressible, self-healable carbon nanotube mechanically enhanced composite hydrogels with high strain sensitivity
Source: Royal Society of Chemistry journal article supplement (doi:10.1039/c9tc04853g), 2019-11-07
Supplement: c9tc04853g3.pdf [file c9tc04853g3.pdf]

Stretchable, compressible, self-healable carbon nanotube mechanically enhanced  
composite hydrogels with high strain sensitivity

Chenguang Pan, Jijun Wang, Xingxiang Ji, Libin Liu\*

Institute of Advanced Energy Materials and Chemistry, School of Chemistry and  
Pharmaceutical Engineering, State Key Laboratory of Biobased Material and Green  
Papermaking, Qilu University of Technology (Shandong Academy of Sciences), Jinan  
250353, China,

Corresponding author. E-mail: lbliu@qlu.edu.cn (Libin Liu)

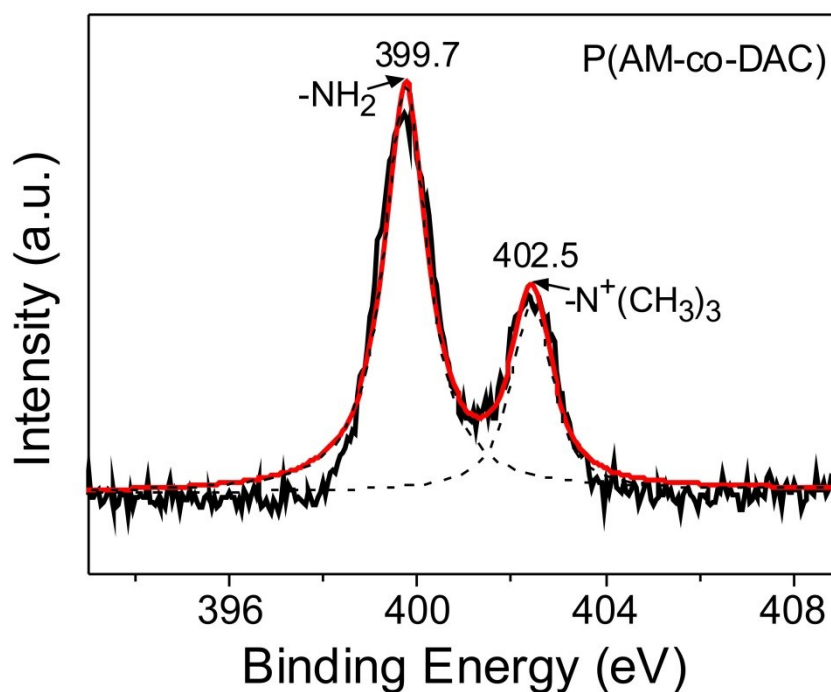

Figure S1. XPS spectra of N 1s.

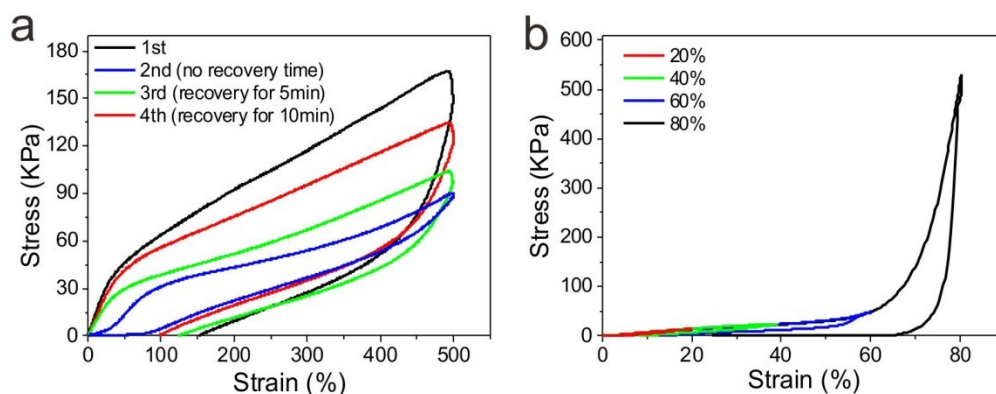

Figure S2. (a) Tensile stress-strain curves of CNT-3wt% under 4 cycles with different recovery time. (b) Compressive stress-strain curves under different compression degree.

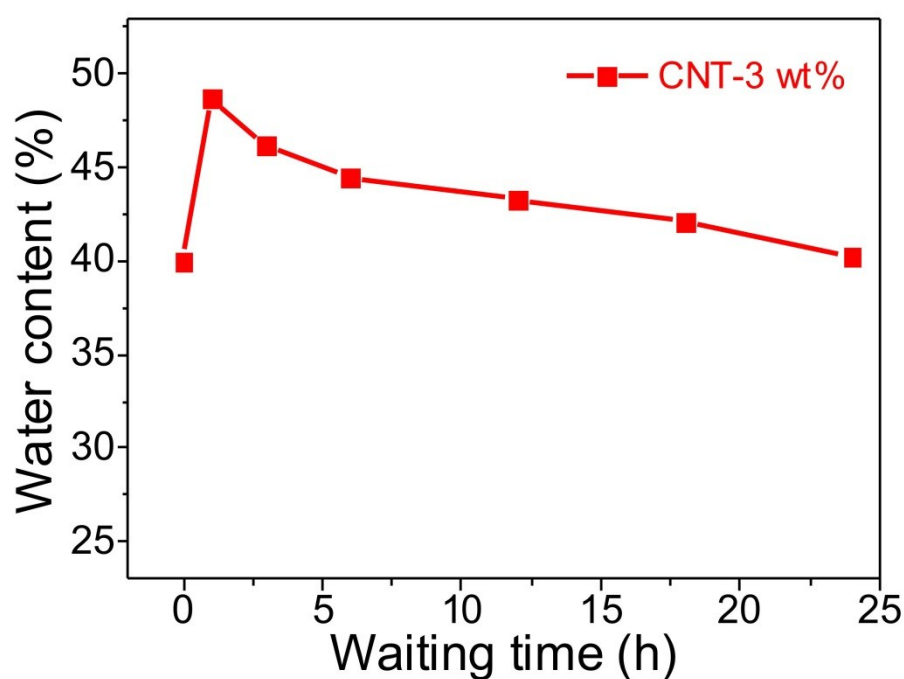

Figure S3. Water content of CNT-3wt% hydrogels under different healing time (waiting time).

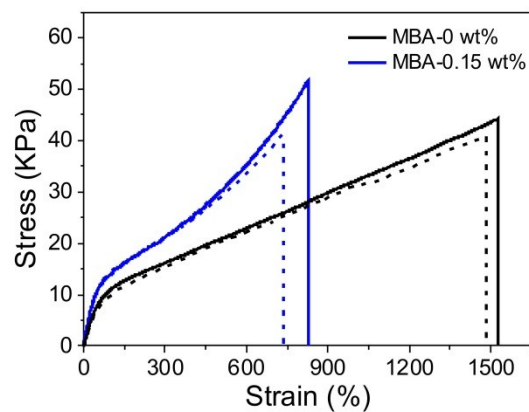

Figure S4. Stress-strain curves of original (solid lines) and healed (dash lines) hydrogels with and without MBA after 24 h healing.

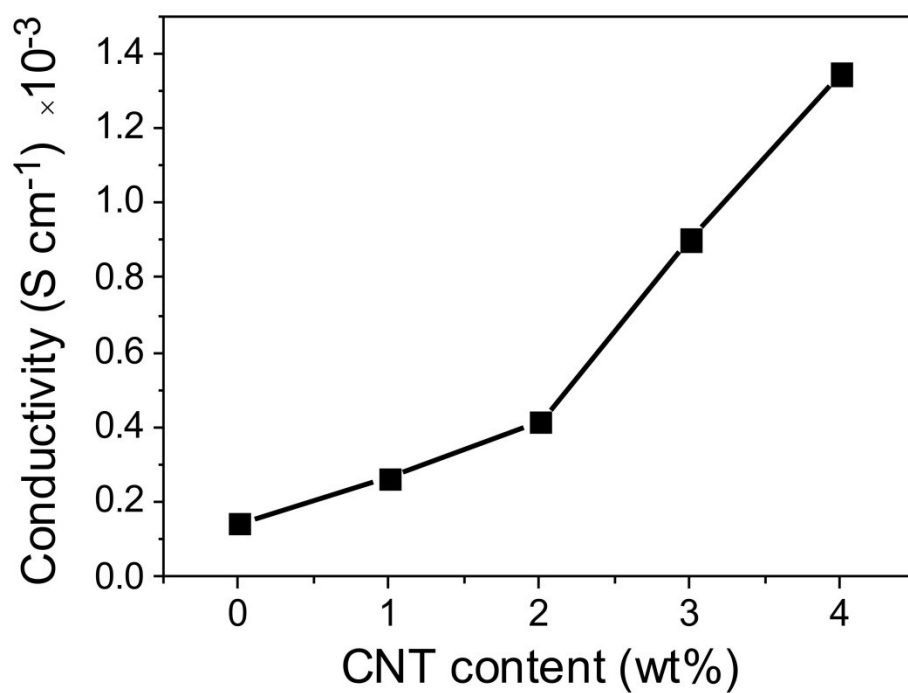

Figure S5. Conductivity of hydrogels with different CNT contents.
